# Supplementary material for: Solid-state NMR – a complementary technique for protein framework characterization
Source: Royal Society of Chemistry journal article supplement (doi:10.1039/d2cc05725e), 2022-12-15
Supplement: d2cc05725e1.pdf [file d2cc05725e1.pdf]

*SUPPORTING INFORMATION*

**Solid-State NMR – a Complementary Technique for Protein Framework Characterization**

Linda Cerofolini,<sup>1,2</sup> Kiefer O. Ramberg,<sup>3</sup> Luis Padilla C.<sup>1,4</sup> Paweł Antonik,<sup>3</sup> Enrico Ravera,<sup>1,2,4</sup> Claudio Luchinat,<sup>1,2,4</sup> Marco Fragai,<sup>\*1,2,4</sup> Peter B. Crowley<sup>\*3</sup>

<sup>1</sup>Magnetic Resonance Center (CERM), University of Florence, Via L. Sacconi 6, 50019 Sesto Fiorentino, Italy.

<sup>2</sup>Consorzio Interuniversitario Risonanze Magnetiche di Metalloproteine (CIRMMP) Via L. Sacconi 6, 50019 Sesto Fiorentino, Italy.

<sup>3</sup>School of Biological and Chemical Sciences, University of Galway, University Road, Galway H91 TK33, Ireland.

<sup>4</sup>Department of Chemistry “Ugo Schiff”, University of Florence, Via della Lastruccia 3, 50019, Sesto Fiorentino, Italy.

\*Corresponding authors; peter.crowley@nuigalway.ie fragai@cerm.unifi.it

**Keywords:** analytical, biomaterials, calixarene, noncovalent, microcrystalline

## Experimental

**Sample preparation.** Uniformly  $^{13}\text{C}/^{15}\text{N}$ -labelled RSL was produced in *E. coli* BL21 transformed with the pET25rsl plasmid and was purified by mannose-affinity chromatography.<sup>1</sup> D-mannose was removed from the sample by extensive dialysis against water. Protein concentrations were determined spectrophotometrically with  $\epsilon_{280} = 44.46 \text{ mM}^{-1}\text{cm}^{-1}$  for the monomer. The ssNMR samples were prepared from 0.5 mL solutions containing 1 mM  $^{13}\text{C}/^{15}\text{N}$ -labelled RSL trimer, 20 mM potassium phosphate, 50 mM NaCl, 5 mM D-fructose, plus 0 or 10 mM **sclx<sub>g</sub>**. The pH was adjusted to 3.4 by adding HCl, which resulted in an instantaneous microcrystalline precipitate in the sample containing **sclx<sub>g</sub>**. The microcrystalline sample (9.0 mg) was packed in a Bruker 3.2 mm rotor by using an ultra-centrifugal device (courtesy of Giotto Biotech s.r.l.) with a Beckman Coulter Optima L80K floor preparative ultracentrifuge equipped with a SW32 swinging bucket at 15,000 rpm and 4 °C. The rotor was sealed with a silicon plug (courtesy of Bruker) and the microcrystals were further packed by MAS spinning at 14 kHz. The sample devoid of **sclx<sub>g</sub>** was flash-frozen in liquid nitrogen and dried in a LIO5P lyophilizer. The freeze-dried sample (13.4 mg) was manually filled into a 3.2 mm rotor with the Bruker tools. This sample was rehydrated by multiple microlitre additions of milli-Q H<sub>2</sub>O until the maximum resolution was achieved in the 1D  $\{^1\text{H}\}^{13}\text{C}$  cross-polarization spectrum (Figure S3).

**NMR spectroscopy.** All of the ssNMR spectra were acquired on a Bruker Advance III spectrometer operating at 800 MHz (19 T, 201.2 MHz  $^{13}\text{C}$  Larmor frequency) and equipped with a Bruker 3.2 mm Efree NCH probe-head. The spectra (Table S1) were recorded at 14 or 20 kHz MAS frequency and the sample temperature was kept at ~280 K. 2D  $^{15}\text{N}$ - $^{13}\text{C}$  NCA, NCO,  $^{13}\text{C}$ - $^{13}\text{C}$  DARR (mixing times 15, 50 and 100 ms) and 3D NCACX, NCOCX, CANCO, NCACB, N(CO)CACB were recorded at 14 kHz. 3D CANCOCA and 2D  $^{13}\text{C}$ - $^{13}\text{C}$  PDS (mixing times 25, 50, 100, 200 and 400 ms) were recorded at 20 kHz. All the experiments were carried out using the pulse sequences reported in the literature.<sup>2-3</sup>

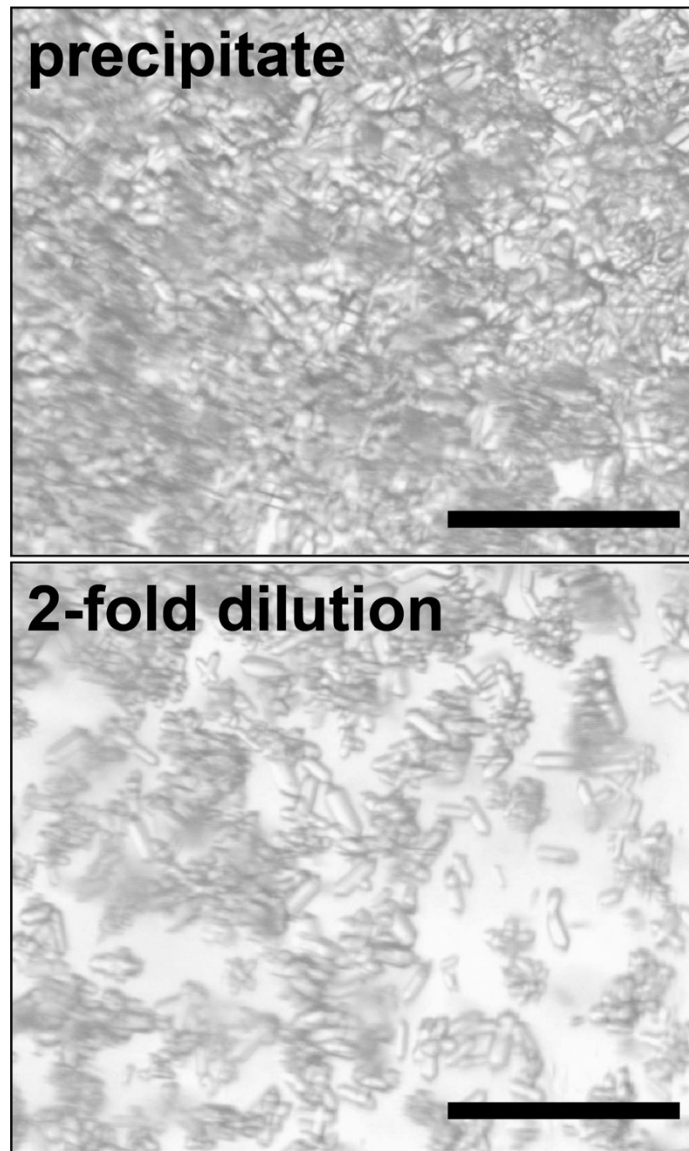

**Figure S1.** Microscope images of the microcrystalline precipitate formed from 1 mM  $^{13}\text{C}/^{15}\text{N}$ -labelled RSL, 10 mM **sclx**<sub>8</sub>, 20 mM potassium phosphate, 50 mM NaCl, and 5 mM D-fructose upon adjusting the pH to 3.4. Images were acquired immediately after pH adjustment. The lower panel is the precipitate diluted 2-fold with buffer. Scale bars are 100  $\mu\text{m}$ .

3D NCACX  
3D NCOCX  
3D CANCO

3D NCACB  
3D NcoCACB

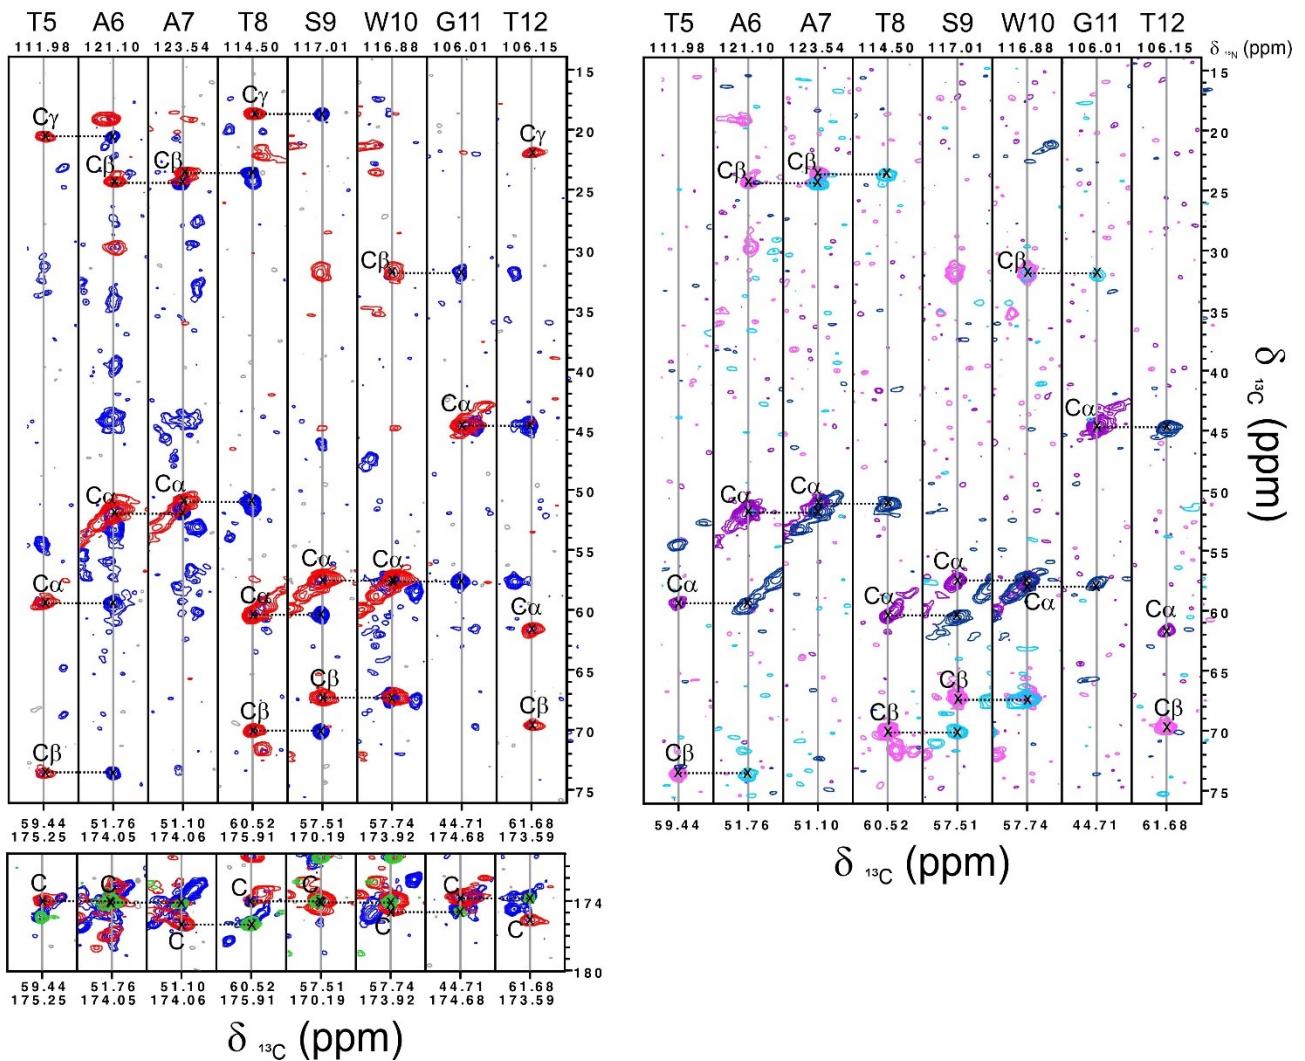

**Figure S2.** Representative resonance assignment of microcrystalline RSL – sclx<sub>8</sub> as per sequential backbone walk for residues 5 to 12.

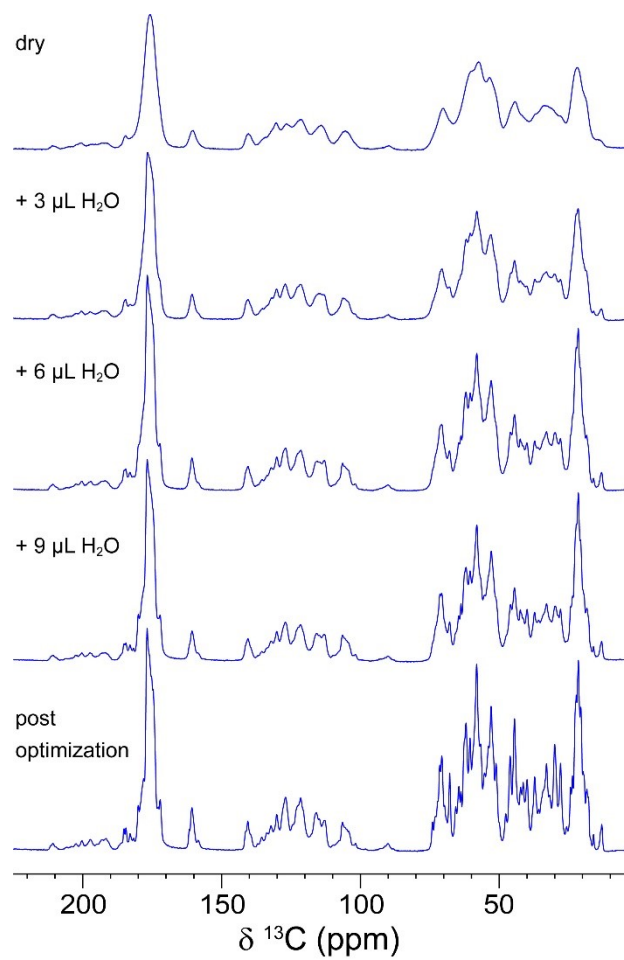

**Figure S3.** 1D  $\{^1\text{H}\}^{13}\text{C}$  CP ssNMR spectra of freeze-dried RSL with increasing volumes of Milli-Q  $\text{H}_2\text{O}$ .

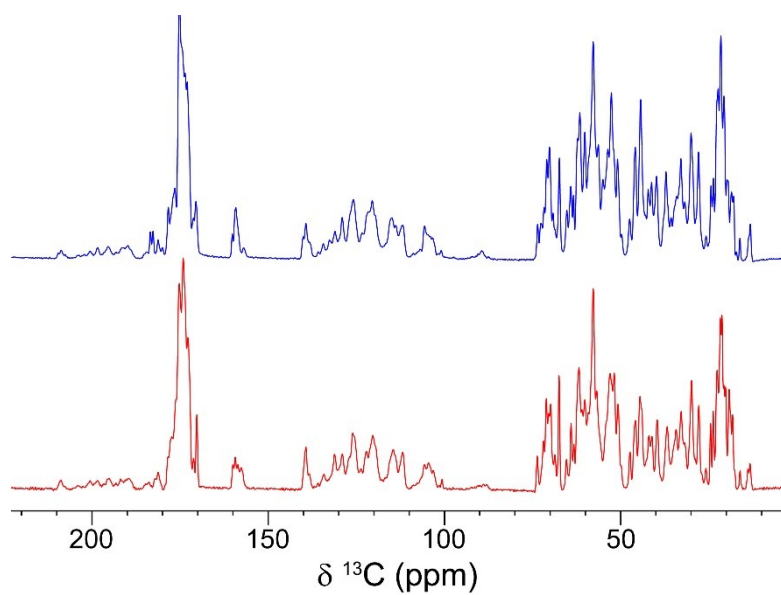

**Figure S4.** 1D  $\{^1\text{H}\}^{13}\text{C}$  CP ssNMR spectra of rehydrated freeze-dried RSL (blue) and microcrystalline RSL – sclx<sub>8</sub> (red).

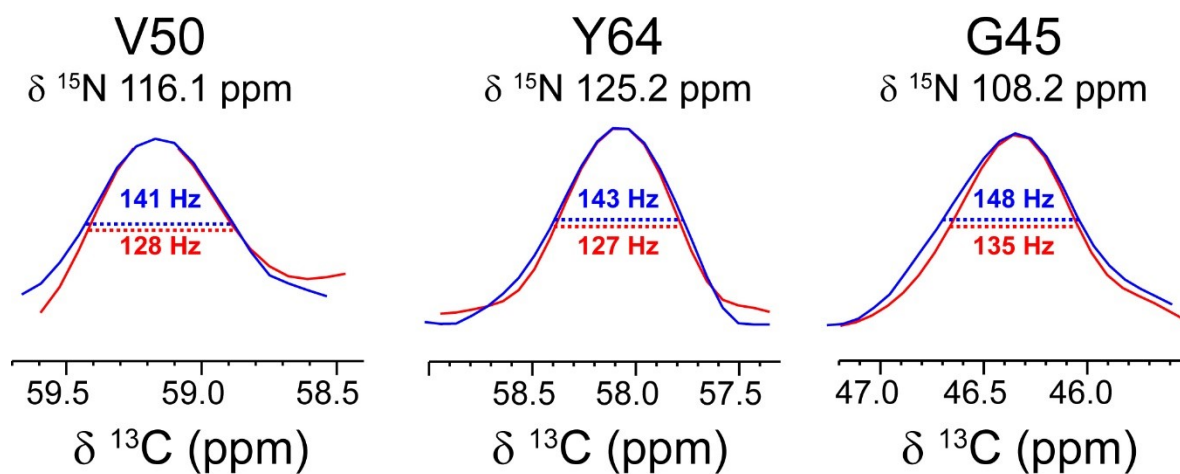

**Figure S5.** 1D projections along the  $^{13}\text{C}$  dimension from representative signals in the 2D  $^{15}\text{N}$ - $^{13}\text{C}$  NCA spectra of rehydrated freeze-dried RSL (blue) and microcrystalline RSL – sclx<sub>8</sub> (red).

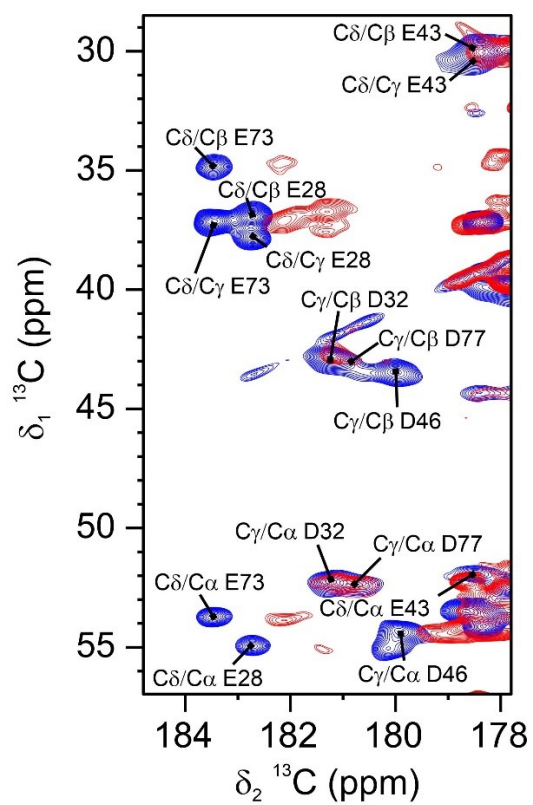

**Figure S6.** Superposed spectral region corresponding to Asp and Glu carboxylate side chains in 2D  $^{13}\text{C}$ - $^{13}\text{C}$  DARR spectra (50 ms mixing time) of microcrystalline RSL – sclx<sub>8</sub> (red) and rehydrated freeze-dried RSL (blue).



**Table S1.** Parameters used for the acquisition of 2D and 3D ssNMR spectra.

| Experiment                 | 2D NCA               | 2D NCO               | 2D DARR/PDS                                              |
|----------------------------|----------------------|----------------------|----------------------------------------------------------|
| <b>TD points</b>           | 3072 (f2) x 192 (f1) | 3072 (f2) x 192 (f1) | 4096(f2) x 1024 (f1)                                     |
| <b>Number of scans</b>     | 64                   | 64                   | 40                                                       |
| <b>D1 (sec)</b>            | 1.5                  | 1.5                  | 1.5                                                      |
| <b>Transfer 1</b>          | HN CP                | HN CP                | HC CP                                                    |
| <b>field [kHz]</b>         | 49(H)35(N)           | 49(H)35(N)           | 78(H)50(C)                                               |
| <b>shape if applicable</b> | 100-70 ramp on H     | 100-70 ramp on H     | 70-100 ramp on H                                         |
| <b>time [ms]</b>           | 1.5                  | 1.5                  | 2                                                        |
| <b>Transfer 2</b>          | NCA DCP              | NCO DCP              | Mixing (ms)                                              |
| <b>field [kHz]</b>         | 80(H)35(N)21(C)      | 80(H)35(N)49(C)      |                                                          |
| <b>shape if applicable</b> | tacn80 on C          | tacn80 on C          |                                                          |
| <b>time [ms]</b>           | 6                    | 5                    | At 14 kHz: 15, 50, 100; at 20 kHz: 25, 50, 100, 200, 400 |

| Experiment                 | 3D NCACX                   | 3D NCOCX                   | 3D CANCO                   | 3D NCACB                   |
|----------------------------|----------------------------|----------------------------|----------------------------|----------------------------|
| <b>TD points</b>           | 3072(f3) x 80(f2) x 64(f1) | 3072(f3) x 40(f2) x 64(f1) | 3072(f3) x 40(f2) x 64(f1) | 2048(f3) x 80(f2) x 72(f1) |
| <b>Number of scans</b>     | 32                         | 32                         | 32                         | 16                         |
| <b>D1 (sec)</b>            | 1.5                        | 1.5                        | 1.5                        | 1.5                        |
| <b>Transfer 1</b>          | HN CP                      | HN CP                      | HCA CP                     | HN CP                      |
| <b>field [kHz]</b>         | 49(H)35(N)                 | 49(H)35(N)                 | 78(H)50(C)                 | 49(H)35(N)                 |
| <b>shape if applicable</b> | 100-70 ramp on H           | 100-70 ramp on H           | 70-100 ramp on H           | 100-70 ramp on H           |
| <b>time [ms]</b>           | 1.5-2                      | 1.5-2                      | 1                          | 1.5-2                      |
| <b>Transfer 2</b>          | NCA DCP                    | NCO DCP                    | CAN DCP                    | NCA DCP                    |
| <b>field [kHz]</b>         | 80(H)35(N)21(C)            | 80(H)35(N)49(C)            | 80(H)35(N)21(C)            | 80(H)35(N)21(C)            |
| <b>shape if applicable</b> | tacn80 on C                | tacn80 on C                | tacn80 on C                | tacn80 on C                |
| <b>time [ms]</b>           | 6                          | 5                          | 6                          | 6                          |
| <b>Transfer 3</b>          | CACX                       |                            | NCO DCP                    | CACB                       |
| <b>field [kHz]</b>         |                            |                            | 80(H)35(N)49(C)            | 7                          |
| <b>shape if applicable</b> |                            |                            | tacn80 on C                | dream                      |
| <b>time [ms]</b>           | 15 and 50                  | 50                         | 5                          |                            |
| <b>Transfer 4</b>          |                            |                            |                            |                            |
| <b>Time [ms]</b>           |                            |                            |                            |                            |

| Experiment                 | 3D N(CO)CACB               | 3D CANCOCA (at 20 kHz)     |
|----------------------------|----------------------------|----------------------------|
| <b>TD points</b>           | 2048(f3) x 80(f2) x 72(f1) | 2048(f3) x 64(f2) x 72(f1) |
| <b>Number of scans</b>     | 64                         | 128 (NUS 31%)              |
| <b>D1 (sec)</b>            | 1.5                        | 1.5                        |
| <b>Transfer 1</b>          | HN CP                      | HCA CP                     |
| <b>field [kHz]</b>         | 49(H)35(N)                 | 90(H)50(C)                 |
| <b>shape if applicable</b> | 100-70 ramp on H           | 70-100 ramp on H           |
| <b>time [ms]</b>           | 1.5-2                      | 1                          |
| <b>Transfer 2</b>          | NCO DCP                    | CAN DCP                    |
| <b>field [kHz]</b>         | 80(H)35(N)49(C)            | 80(H)12(N)8(C)             |
| <b>shape if applicable</b> | tacn80 on C                | tacn80 on C                |
| <b>time [ms]</b>           | 5                          | 6                          |
| <b>Transfer 3</b>          | CACB                       | NCO DCP                    |
| <b>field [kHz]</b>         | 7                          | 80(H)12(N)8(C)             |
| <b>shape if applicable</b> | dream                      | tacn80 on C                |
| <b>time [ms]</b>           |                            | 1                          |
| <b>Transfer 4</b>          |                            | COCA mixing                |
| <b>Time [ms]</b>           |                            | 20                         |

**Table S2.**  $^{15}\text{N}/^{13}\text{C}$  chemical shifts of microcrystalline RSL – sclx<sub>8</sub>. The spectra were collected at 800 MHz ( $^1\text{H}$  Larmor frequency), at  $\sim 280$  K and MAS of 14 kHz.

| Residue # | Residue Name | N      | C $^{\alpha}$ | C $^{\beta}$ | C      | C $^{\gamma}$ |       | C $^{\delta}$ | C $^{\epsilon}$ |
|-----------|--------------|--------|---------------|--------------|--------|---------------|-------|---------------|-----------------|
| 1         | SER          |        |               |              |        |               |       |               |                 |
| 2         | SER          |        |               |              |        |               |       |               |                 |
| 3         | VAL          |        |               |              |        |               |       |               |                 |
| 4         | GLN          |        |               |              |        |               |       |               |                 |
| 5         | THR          | 111.98 | 59.44         | 73.67        | 174.05 | 20.61         |       |               |                 |
| 6         | ALA          | 121.10 | 51.76         | 24.44        | 174.06 |               |       |               |                 |
| 7         | ALA          | 123.54 | 51.10         | 23.67        | 175.91 |               |       |               |                 |
| 8         | THR          | 114.50 | 60.52         | 70.11        | 170.19 | 18.74         |       |               |                 |
| 9         | SER          | 117.01 | 57.51         | 67.37        | 173.92 |               |       |               |                 |
| 10        | TRP          | 116.88 | 57.74         | 32.02        | 174.68 | 111.58        |       | 126.94        |                 |
| 11        | GLY          | 106.01 | 44.71         |              | 173.59 |               |       |               |                 |
| 12        | THR          | 106.15 | 61.68         | 69.76        | 175.77 | 22.03         |       |               |                 |
| 13        | VAL          | 124.50 | 67.96         | 29.89        | 175.31 | 22.94         | 20.67 |               |                 |
| 14        | PRO          | 132.95 | 62.25         | 32.79        | 175.38 | 27.80         |       | 50.85         |                 |
| 15        | SER          | 110.43 | 58.88         | 63.94        | 173.37 |               |       |               |                 |
| 16        | ILE          | 118.82 | 59.96         | 42.50        | 177.01 | 27.96         | 18.03 | 13.87         |                 |
| 17        | ARG          | 128.69 | 53.16         | 33.82        | 173.58 | 27.60         |       | 43.07         |                 |
| 18        | VAL          | 121.25 | 60.76         | 34.27        | 176.14 | 20.24         | 19.2  |               |                 |
| 19        | TYR          | 132.56 | 56.79         | 41.02        | 174.86 |               |       |               |                 |
| 20        | THR          | 117.67 | 61.65         | 71.07        | 172.76 | 21.17         |       |               |                 |
| 21        | ALA          | 131.31 | 50.70         | 19.39        | 176.28 |               |       |               |                 |
| 22        | ASN          | 122.49 | 52.42         | 41.17        | 175.42 |               |       |               |                 |
| 23        | ASN          | 126.11 | 54.13         | 37.17        | 175.30 | 178.58        |       |               |                 |
| 24        | GLY          | 103.84 | 45.71         |              | 175.57 |               |       |               |                 |
| 25        | LYS          | 123.02 | 54.85         | 36.71        | 175.33 | 35.52         |       | 33.08         | 44.12           |
| 26        | ILE          | 124.23 | 59.31         | 39.44        | 175.47 | 27.91         | 20.29 | 16.06         |                 |
| 27        | THR          | 115.19 | 59.89         | 71.79        | 173.32 | 22.39         |       |               |                 |
| 28        | GLU          | 121.65 | 54.43         | 37.14        | 175.05 |               |       |               |                 |
| 29        | ARG          | 127.76 | 53.31         | 34.29        | 175.51 | 27.67         |       | 43.81         |                 |
| 30        | CYS          | 119.26 | 56.25         | 30.33        | 171.21 |               |       |               |                 |
| 31        | TRP          | 121.61 | 56.36         | 29.89        | 175.33 | 113.68        |       | 126.12        |                 |
| 32        | ASP          | 126.71 | 52.31         | 43.06        | 174.58 |               |       |               |                 |
| 33        | GLY          | 102.44 | 45.79         |              | 174.28 |               |       |               |                 |
| 34        | LYS          |        |               |              |        |               |       |               |                 |
| 35        | GLY          | 107.29 | 44.15         |              | 173.18 |               |       |               |                 |
| 36        | TRP          | 122.73 | 57.23         | 30.13        | 177.43 | 113.81        |       | 126.33        |                 |
| 37        | TYR          | 119.37 | 56.00         | 41.13        | 174.44 | 120.69        |       | 130.83        |                 |
| 38        | THR          | 121.57 | 63.87         | 69.23        | 175.19 | 22.81         |       |               |                 |
| 39        | GLY          | 116.22 | 44.34         |              | 174.27 |               |       |               |                 |
| 40        | ALA          | 121.81 | 52.99         | 19.17        | 178.14 |               |       |               |                 |
| 41        | PHE          | 119.05 | 60.15         | 41.69        | 174.83 |               |       |               |                 |
| 42        | ASN          | 128.67 | 52.77         | 39.62        | 173.84 | 177.20        |       |               |                 |
| 43        | GLU          | 121.18 | 51.63         | 29.88        | 172.84 | 30.28         |       | 176.99        |                 |
| 44        | PRO          | 132.84 | 62.31         | 32.72        | 176.92 | 20.44         |       | 49.78         |                 |
| 45        | GLY          | 108.39 | 46.19         |              | 170.31 |               |       |               |                 |
| 46        | ASP          | 115.98 | 53.02         | 36.27        | 175.20 |               |       |               |                 |
| 47        | ASN          | 118.32 | 52.74         | 39.68        | 172.76 |               |       |               |                 |
| 48        | VAL          | 125.92 | 59.08         | 36.61        | 172.76 | 23.82         | 17.8  |               |                 |

|    |     |        |       |       |        |        |       |        |
|----|-----|--------|-------|-------|--------|--------|-------|--------|
| 49 | SER | 121.76 | 58.45 | 67.47 | 172.10 |        |       |        |
| 50 | VAL | 116.30 | 59.02 | 35.27 | 172.53 | 23.68  | 21.35 |        |
| 51 | THR | 118.85 | 60.98 | 69.87 | 170.10 | 18.26  |       |        |
| 52 | SER | 118.86 | 57.66 | 67.45 | 170.15 |        |       |        |
| 53 | TRP | 118.76 | 57.63 | 31.72 | 172.36 | 112.60 |       | 126.04 |
| 54 | LEU | 121.99 | 53.51 | 45.31 | 178.35 |        |       |        |
| 55 | VAL | 123.03 | 62.44 | 32.38 | 177.55 | 21.35  | 21.15 |        |
| 56 | GLY | 119.67 | 47.32 |       | 174.67 |        |       |        |
| 57 | SER | 122.89 | 58.13 | 64.06 | 173.65 |        |       |        |
| 58 | ALA | 127.50 | 51.74 | 20.11 | 175.33 |        |       |        |
| 59 | ILE | 124.45 | 56.48 | 39.76 | 172.35 | 26.89  | 18.32 | 13.21  |
| 60 | HIS | 123.42 | 53.22 | 29.86 | 172.76 |        |       |        |
| 61 | ILE | 119.05 | 60.25 | 41.69 | 176.66 | 28.01  | 19.07 | 13.31  |
| 62 | ARG | 129.88 | 53.22 | 32.94 | 172.95 | 27.87  |       | 43.67  |
| 63 | VAL | 123.70 | 60.23 | 34.14 | 174.21 | 21.43  | 21.26 |        |
| 64 | TYR | 125.37 | 57.94 | 36.86 | 175.00 | 119.51 |       |        |
| 65 | ALA | 132.84 | 50.51 | 22.50 | 176.57 |        |       |        |
| 66 | SER | 118.67 | 58.01 | 65.33 | 173.42 |        |       |        |
| 67 | THR | 121.86 | 62.11 | 71.25 | 174.85 | 21.07  |       |        |
| 68 | GLY | 117.34 | 47.65 |       | 175.50 |        |       |        |
| 69 | THR | 116.95 | 61.28 | 68.57 | 174.38 | 21.67  |       |        |
| 70 | THR | 119.26 | 62.35 | 70.52 | 173.95 | 21.59  |       |        |
| 71 | THR | 126.68 | 61.68 | 70.54 | 172.74 | 22.71  |       |        |
| 72 | THR | 125.22 | 61.92 | 70.99 | 171.22 | 21.76  |       |        |
| 73 | GLU | 129.06 | 53.74 | 34.75 | 173.32 | 36.97  |       | 171.2  |
| 74 | TRP | 129.28 | 55.57 | 33.22 | 176.35 | 111.95 |       | 125.2  |
| 75 | CYS | 120.77 | 56.97 | 29.81 | 173.58 |        |       |        |
| 76 | TRP | 124.61 | 56.67 | 28.85 | 175.54 |        |       |        |
| 77 | ASP | 126.52 | 52.50 | 42.70 | 174.50 |        |       |        |
| 78 | GLY | 102.27 | 45.96 |       | 174.17 |        |       |        |
| 79 | ASN | 118.72 | 52.50 | 39.70 | 173.73 | 177.68 |       |        |
| 80 | GLY | 107.47 | 44.10 |       | 172.63 |        |       |        |
| 81 | TRP | 121.91 | 57.51 | 29.88 | 178.38 |        |       |        |
| 82 | THR | 116.76 | 59.99 | 72.05 | 173.24 | 21.48  |       |        |
| 83 | LYS | 125.53 | 57.48 | 36.75 | 178.21 |        |       |        |
| 84 | GLY | 116.70 | 44.52 |       | 174.65 |        |       |        |
| 85 | ALA | 121.00 | 52.25 | 19.22 | 177.18 |        |       |        |
| 86 | TYR | 119.90 | 61.20 | 39.90 | 174.90 |        |       |        |
| 87 | THR | 114.73 | 58.55 | 72.39 | 173.24 | 22.55  |       |        |
| 88 | ALA | 123.12 | 54.06 | 20.15 | 176.39 |        |       |        |
| 89 | THR |        |       |       |        |        |       |        |
| 90 | ASN |        |       |       |        |        |       |        |

---

**Table S3.**  $^{15}\text{N}/^{13}\text{C}$  chemical shifts of rehydrated freeze-dried RSL. The spectra were collected at 800 MHz ( $^1\text{H}$  Larmor frequency), at  $\sim 280$  K and MAS of 14 kHz.

| Residue # | Residue Name | N      | C $^\alpha$ | C $^\beta$ | C      | C $^\gamma$ | C $^\delta$ | C $^\epsilon$ | C $^\zeta$ |
|-----------|--------------|--------|-------------|------------|--------|-------------|-------------|---------------|------------|
| 1         | SER          |        |             |            |        |             |             |               |            |
| 2         | SER          |        |             |            |        |             |             |               |            |
| 3         | VAL          |        |             |            |        |             |             |               |            |
| 4         | GLN          |        |             |            |        |             |             |               |            |
| 5         | THR          | 112.84 | 59.43       | 73.66      | 174.01 | 20.78       |             |               |            |
| 6         | ALA          | 121.66 | 51.91       | 24.51      | 174.65 |             |             |               |            |
| 7         | ALA          | 124.33 | 51.29       | 23.79      | 175.66 |             |             |               |            |
| 8         | THR          | 114.22 | 60.51       | 70.34      | 170.8  | 18.74       |             |               |            |
| 9         | SER          | 116.52 | 57.44       | 67.45      | 174.38 |             |             |               |            |
| 10        | TRP          | 117.22 | 57.82       | 32.02      | 174.93 | 111.58      |             | 126.94        |            |
| 11        | GLY          | 106.35 | 44.87       |            | 173.96 |             |             |               |            |
| 12        | THR          | 106.24 | 61.68       | 70.14      | 175.71 | 22.27       |             |               |            |
| 13        | VAL          | 124.41 | 67.99       | 30.12      | 175.55 | 23.28       | 20.79       |               |            |
| 14        | PRO          | 132.74 | 62.52       | 32.91      | 175.24 | 28.02       |             | 51.02         |            |
| 15        | SER          | 109.93 | 58.91       | 64.17      | 173.55 |             |             |               |            |
| 16        | ILE          | 118.97 | 60.02       | 42.49      | 177.81 | 28.38       | 18.43       | 13.79         |            |
| 17        | ARG          | 128.13 | 53.91       | 34.35      | 174.31 | 27.68       |             | 44.34         |            |
| 18        | VAL          | 120.84 | 60.94       | 34.74      | 176.48 | 20.7        | 19.02       |               |            |
| 19        | TYR          | 133.06 | 57.13       | 41.2       | 175.21 |             |             |               |            |
| 20        | THR          | 116.94 | 61.83       | 71.21      | 173.1  | 21.25       |             |               |            |
| 21        | ALA          | 131.77 | 50.96       | 19.57      | 176.57 |             |             |               |            |
| 22        | ASN          | 122.15 | 52.83       | 41.35      | 175.42 |             |             |               |            |
| 23        | ASN          | 125.88 | 54.31       | 37.17      | 175.69 | 178.54      |             |               |            |
| 24        | GLY          | 104.42 | 45.92       |            | 175.53 |             |             |               |            |
| 25        | LYS          | 123.25 | 55.3        | 35.75      | 174.37 | 29.95       |             | 34.78         | 44.58      |
| 26        | ILE          | 123.91 | 59.54       | 39.8       | 175.69 | 28.1        | 20.52       | 16.25         |            |
| 27        | THR          | 115.03 | 60.22       | 71.84      | 173.32 | 22.39       |             |               |            |
| 28        | GLU          | 122.44 | 55.05       | 37.09      | 175.76 | 37.94       |             | 182.96        |            |
| 29        | ARG          | 127.32 | 52.81       | 33.66      | 175.42 | 25.84       |             | 42.09         |            |
| 30        | CYS          | 119.16 | 56.33       | 30.22      | 171.33 |             |             |               |            |
| 31        | TRP          | 121.56 | 56.34       | 29.89      | 175.55 | 111.73      |             | 126.12        |            |
| 32        | ASP          | 126.73 | 52.39       | 43.06      | 174.65 | 181.46      |             |               |            |
| 33        | GLY          | 102.36 | 45.74       |            | 174.78 |             |             |               |            |
| 34        | LYS          |        |             |            |        |             |             |               |            |
| 35        | GLY          | 107.14 | 44.57       |            | 173.27 |             |             |               |            |
| 36        | TRP          | 123.13 | 58.06       | 29.98      | 177.92 | 113.81      |             | 126.69        |            |
| 37        | TYR          | 119.05 | 56.75       | 40.58      | 174.67 | 120.69      |             | 130.83        |            |
| 38        | THR          | 122.16 | 64.53       | 69.45      | 175.38 | 22.99       |             |               |            |
| 39        | GLY          | 115.81 | 44.56       |            | 174.36 |             |             |               |            |
| 40        | ALA          | 120.53 | 53.65       | 20.07      | 178.9  |             |             |               |            |
| 41        | PHE          | 117.81 | 60.73       | 41.69      | 175.11 |             |             |               |            |
| 42        | ASN          | 128.79 | 52.99       | 39.77      | 174.01 | 175.58      |             |               |            |
| 43        | GLU          | 121.42 | 52.12       | 29.88      | 173.1  | 30.28       |             | 178.72        |            |
| 44        | PRO          | 132.6  | 62.56       | 33.01      | 177.07 | 28.05       |             | 49.72         |            |
| 45        | GLY          | 108.16 | 46.32       |            | 170.47 |             |             |               |            |
| 46        | ASP          | 117.9  | 54.6        | 43.63      | 175.88 | 180.2       |             |               |            |
| 47        | ASN          | 116.88 | 52.63       | 43.74      | 172.91 |             |             |               |            |
| 48        | VAL          | 125.58 | 59.27       | 36.64      | 172.99 | 23.97       | 17.93       |               |            |

|    |     |        |       |       |        |        |       |        |
|----|-----|--------|-------|-------|--------|--------|-------|--------|
| 49 | SER | 122.36 | 58.54 | 67.55 | 172.6  |        |       |        |
| 50 | VAL | 116.46 | 59.3  | 35.8  | 172.65 | 23.68  | 21.94 |        |
| 51 | THR | 118.28 | 61.57 | 70.09 | 170.53 | 18.01  |       |        |
| 52 | SER | 118.29 | 57.87 | 67.45 | 170.78 |        |       |        |
| 53 | TRP | 118.37 | 58.02 | 31.72 | 172.47 | 112.6  |       | 126.04 |
| 54 | LEU | 123.14 | 53.09 | 44.46 | 178.64 |        |       |        |
| 55 | VAL | 123.03 | 62.57 | 32.38 | 177.58 | 22.73  | 21.29 |        |
| 56 | GLY | 119.89 | 47.71 |       | 175.09 |        |       |        |
| 57 | SER | 122.98 | 58.27 | 64.18 | 173.73 |        |       |        |
| 58 | ALA | 127.27 | 51.91 | 20.55 | 175.46 |        |       |        |
| 59 | ILE | 123.87 | 56.59 | 40    | 172.53 | 27.08  | 18.45 | 13.3   |
| 60 | HIS | 123.26 | 53.11 | 30.12 | 173.09 |        |       |        |
| 61 | ILE | 119.21 | 60.31 | 41.41 | 177.23 | 28.29  | 19.38 | 13.2   |
| 62 | ARG | 129.9  | 53.45 | 32.97 | 173.15 | 27.91  |       | 44.04  |
| 63 | VAL | 123.31 | 60.34 | 34.16 | 174.5  | 21.77  | 21.42 |        |
| 64 | TYR | 125.37 | 58    | 36.84 | 175.49 | 119.51 |       |        |
| 65 | ALA | 132.61 | 50.74 | 22.56 | 176.94 |        |       |        |
| 66 | SER | 118.54 | 58.28 | 65.34 | 173.75 |        |       |        |
| 67 | THR | 121.61 | 62.47 | 71.25 | 174.85 | 21.21  |       |        |
| 68 | GLY | 118.25 | 47.55 |       | 175.36 |        |       |        |
| 69 | THR | 115.96 | 61.2  | 68.86 | 174.86 | 22.04  |       |        |
| 70 | THR | 119.92 | 62.59 | 70.52 | 174.16 | 21.83  |       |        |
| 71 | THR | 127.33 | 61.73 | 70.64 | 173.14 | 22.82  |       |        |
| 72 | THR | 125.56 | 62.13 | 70.95 | 171.68 | 21.63  |       |        |
| 73 | GLU | 128.7  | 53.88 | 34.96 | 173.57 | 37.25  |       | 183.7  |
| 74 | TRP | 129.5  | 55.51 | 33.62 | 176.65 | 111.95 |       | 125.2  |
| 75 | CYS | 120.59 | 57.47 | 29.55 | 173.68 |        |       |        |
| 76 | TRP | 124.62 | 56.86 | 28.41 | 175.54 |        |       |        |
| 77 | ASP | 126.4  | 52.56 | 43.53 | 174.83 | 180.91 |       |        |
| 78 | GLY | 101.99 | 46.03 |       | 174.52 |        |       |        |
| 79 | ASN | 118.35 | 52.7  | 40.06 | 173.95 | 177.23 |       |        |
| 80 | GLY | 107.09 | 44.61 |       | 174.19 |        |       |        |
| 81 | TRP | 123.82 | 58.16 | 29.88 | 178.54 |        |       |        |
| 82 | THR | 116.49 | 60.29 | 72.55 | 174.45 | 21.64  |       |        |
| 83 | LYS | 124.97 | 56.97 | 36.75 | 178.43 |        |       |        |
| 84 | GLY | 114.94 | 44.24 |       | 174.98 |        |       |        |
| 85 | ALA | 120.73 | 52.91 | 19.86 | 177.4  |        |       |        |
| 86 | TYR | 119.05 | 61.77 | 40.14 | 175.35 |        |       |        |
| 87 | THR | 115.12 | 58.76 | 72.86 | 173.28 | 22.76  |       |        |
| 88 | ALA | 124.28 | 53.11 | 20.92 | 176.67 |        |       |        |
| 89 | THR |        |       |       |        |        |       |        |
| 90 | ASN |        |       |       |        |        |       |        |

---

## References

1. P. M. Antonik, A. N. Volkov, U. N. Broder, D. Lo Re, N. A. J. van Nuland, and P. B. Crowley, *Biochemistry*, 2016, **55**, 1195–203.
2. M. Fragai, C. Luchinat, G. Parigi, E. Ravera, *J. Biomol. NMR*, 2013, **57**, 155–166.
3. D. Rizzo, L. Cerofolini, S. Giuntini, L. Iozzino, C. Pergola, F. Sacco, A. Palmese, E. Ravera, C. Luchinat, F. Baroni and M. Fragai, *J. Am. Chem. Soc.*, 2022, **144**, 10006–10016.
